# Supplementary material for: The widespread occurrence of tRNA‐derived fragments in Saccharomyces cerevisiae
Source: PubMed Central journal article supplement (PMC5302060; doi:10.1002/2211-5463.12127), 2016-10-21

## Supporting material

### The widespread occurrence of tRNA-derived fragments in *Saccharomyces cerevisiae*

Kamilla Bąkowska-Żywicka<sup>1\*</sup>, Anna M. Mleczko<sup>1</sup>, Marta Kasprzyk<sup>1</sup>, Piotr Machtel<sup>1</sup>, Marek Żywicki<sup>2</sup>, and Tomasz Twardowski<sup>1</sup>

<sup>1</sup>Institute of Bioorganic Chemistry Polish Academy of Sciences, Noskowskiego 12/14, 61-704 Poznan, Poland

<sup>2</sup> Department of Computational Biology, Institute of Molecular Biology and Biotechnology, Faculty of Biology A. Mickiewicz University in Poznan, Umultowska 89, 61-614 Poznan, Poland

\* To whom correspondence should be addressed. Tel: +48/618528503; Fax: +48/6185280532; Email: bakowska@ibch.poznan.pl

**Table S1. Sequences of antisense DNA probes used in this study. Hybridization temperature is indicated ( $T_H$ ).**

| tRNA isotype              | 5'-probe sequence                | $T_H$ | 3'-probe sequence                    | $T_H$ |
|---------------------------|----------------------------------|-------|--------------------------------------|-------|
| tRNA <sup>Ala</sup> (AGC) | AGGGAGCGCGTACCGACTACGCCACACGCC   | 55°C  | TTGGACGAGTCCGGAATCGAACCGGAGACC       | 55°C  |
| tRNA <sup>Ala</sup> (TGC) | GGGAAGCGCGTACCAACTGCGCCATGTGCC   | 45°C  | TTGGACGCAACCGGAATCGAACCGATGACC       | 45°C  |
| tRNA <sup>Arg</sup> (ACG) | TGACCATTGGGCCACGAGGA             | 45°C  | CCCCGCCAGGACTCGAACCTGGAATC           | 55°C  |
| tRNA <sup>Arg</sup> (CCG) | GAATGCATGCTAACCATTCACACTAGAGGAGC | 50°C  | TCCTCCCGGGACTCGAACCCGGATC            | 55°C  |
| tRNA <sup>Arg</sup> (CCT) | GGGAGACGCGTTACCATTCACGCCAACGGAAC | 55°C  | TCCGTACGGGACTCGAACCCGAGT             | 50°C  |
| tRNA <sup>Arg</sup> (TCT) | GTCAGACGCGTTGCCATTACGCCACGCGAGC  | 55°C  | CGATGGGGTTCGAACCCATAATCTT            | 45°C  |
| tRNA <sup>Asn</sup> (GTT) | GCACGCCTTAACCAACTTGGCCATGGAGTC   | 50°C  | CGACCCAGTGAGGGTTGAACCTCACGATCTTGGCAT | 45°C  |
| tRNA <sup>Asp</sup> (GTC) | GCGCCATTCTGACCATTAAAC            | 42°C  | GGTCCGCGACGGGGAATTGAACCCCG           | 55°C  |
| tRNA <sup>Cys</sup> (GCA) | GCGCTACCACTGCGCCATACGAGC         | 50°C  | CGCACTCAGGATCGAACTAAGGACC            | 50°C  |
| tRNA <sup>Gln</sup> (CTG) | CCGAAAGTGATAACCACTACACTATAGGAC   | 50°C  | TCCCACCCGGATTTCGAACCTGGGG            | 50°C  |
| tRNA <sup>Gln</sup> (TTG) | CCGAAAGTGATAACCACTACACTATAAAAC   | 42°C  | TCTTACCCGGATTTCGAACCCGGG             | 42°C  |
| tRNA <sup>Glu</sup> (CTC) | CGTGATGTGATAGCCGTTACACTACATCGG   | 50°C  | GGCTCCGAAGCGGGGAGTTCGAACCCCGG        | 55°C  |
| tRNA <sup>Glu</sup> (TTC) | CGTGATGTGATAGCCGTTACACTATATCGG   | 50°C  | GGCTCCGCTACGGGGAGTTCGAACCCCGG        | 55°C  |
| tRNA <sup>Gly</sup> (CCC) | AACCACTGAACCACTTTCGC             | 42°C  | GAAGCCGGGAATCGAAC                    | 42°C  |
| tRNA <sup>Gly</sup> (GCC) | TACCACTAAACCACTTTCGC             | 42°C  | CAAGCCCGGAATCGAAC                    | 42°C  |
| tRNA <sup>Gly</sup> (TCC) | AACCACTACACTAACCGCCC             | 42°C  | GAGCGGTACGAGAATCGAAC                 | 42°C  |
| tRNA <sup>His</sup> (GTG) | TGTGTACTAACCACTATACTAAGATGG      | 45°C  | AGAATCGAACCCAGGGTTTCA                | 60°C  |
| tRNA <sup>Ile</sup> (AAT) | GCCTTAACCAACTGGGCCAAGAGACC       | 50°C  | TGGTCTCTAGCGGGATCG                   | 42°C  |
| tRNA <sup>Ile</sup> (TAT) | CGAAGCTCTAACCACTGAGCTACACGAGC    | 50°C  | ATTGAACCCACGACGGTTCGCGT              | 45°C  |
| tRNA <sup>Leu</sup> (CAA) | TGAATCAGCGCCTTAGACCGCTCGGCC      | 55°C  | GGTTGCTAAGAGATTCGAACCTTGCATCT        | 50°C  |
| tRNA <sup>Leu</sup> (GAG) | TCGACCTGACGCCTTAGACCACTCGGCC     | 55°C  | GATACCCGCGGGGTTGAACCCGCGCTCC         | 55°C  |
| tRNA <sup>Leu</sup> (TAA) | TAACTCTGCCGCTTAGACCACTCGGCC      | 55°C  | GAAGGATGCGAGGTTTCGAACCTCGCGGGAC      | 42°C  |
| tRNA <sup>Leu</sup> (TAG) | TAAATCTGACGCCTTAAACCACTCGGCC     | 50°C  | GAGAGCTAAGGGATTCGAACCCCTTGCATCC      | 50°C  |
| tRNA <sup>Lys</sup> (CCT) | CGCGCTACCGATTGCGCCAACAAGGC       | 55°C  | GGCTCGAACCCCTAACCTT                  | 42°C  |
| tRNA <sup>Lys</sup> (TTT) | GCCGAACGCTCTACCAACTGAGC          | 45°C  | CTCCTCATAGGGGGCTCGAACCC              | 50°C  |
| tRNA <sup>Met</sup> (CAT) | CTGACGCTCTTCTACTGAGCTACTGAAGC    | 50°C  | TGCTCCAGGGGAGGTTTCGAACCTCAGCTTCAG    | 55°C  |
| tRNA <sup>Phe</sup> (GAA) | CTCTCCAACCTGAGCTAAATCCG          | 45°C  | TGCGAATTCTGTGGATCGAACACAGGACC        | 50°C  |
| tRNA <sup>Pro</sup> (AGG) | CGAGAATCATACCTTAGACCACACGCC      | 50°C  | CGAGCCGGGACTCGAACCCGGG               | 55°C  |
| tRNA <sup>Pro</sup> (TGG) | CGAGAATCATACCACTAGACCACACGCC     | 50°C  | CGAGCTGGGAATTGAACCCAGG               | 45°C  |
| tRNA <sup>Ser</sup> (AGA) | CGCCTTAACCACTCGGCCAAGTTGCC       | 50°C  | ACAACCTGCAGGACTCGAAC                 | 42°C  |
| tRNA <sup>Ser</sup> (CGA) | CGCCTTAACCACTCGGCCATAGTGCC       | 50°C  | CGACACCAGCAGGATTTGAACCAGCG           | 50°C  |
| tRNA <sup>Ser</sup> (GCT) | CGCCTTAACCACTCGGCCACTGGGAC       | 55°C  | CGTCACAGACAGGATTCGAACCTGCG           | 50°C  |
| tRNA <sup>Thr</sup> (AGT) | GCCTTACCAACTTGGCCATA             | 42°C  | TTGAACCGATGATCTCCACA                 | 42°C  |
| tRNA <sup>Thr</sup> (CGT) | AGTGCGATGCCTTACCACTTGGCC         | 45°C  | CTGTGGGAATTGAACCCACGATCCCCGC         | 55°C  |
| tRNA <sup>Thr</sup> (TGT) | ACAAGTGCAACGCTCTACCA             | 42°C  | GAATTGAACCTAACGACCTTTGC              | 42°C  |
| tRNA <sup>Trp</sup> (CCA) | GCTCTACCACTTGGCCACCGCTTC         | 50°C  | TGAAACGGACAGGAATTGAACC               | 42°C  |
| tRNA <sup>Tyr</sup> (GTA) | GCGCCTTAACCAACTTGGCTACCGAGAG     | 50°C  | TCTCCCGGGGGGAGTCCG                   | 45°C  |
| tRNA <sup>Val</sup> (AAC) | GCCATAACCGACTAGACCACGAAAC        | 50°C  | ATTTCCGCCAGGAACGAACTGGGGACG          | 42°C  |
| tRNA <sup>Val</sup> (CAC) | CGTGATAGCCGCTACACTATTGGAAC       | 50°C  | GTTCCAACCGAGGATTCGAACCTCGGGACC       | 50°C  |
| tRNA <sup>Val</sup> (TAC) | CTTGAACCACTGGACCATTGGACC         | 50°C  | GATCCAACCGAGGTTTCGAACCTCGGGATC       | 50°C  |

**Figure S1. tRNA-derived fragments in *Saccharomyces cerevisiae*.**

Detection of 3'- and 5'-derived tRNA fragments visualized by northern blot hybridization assays. Numbers correspond to the RNA samples derived from *S. cerevisiae* grown under the following conditions: 1- heat stress, 2 – cold stress, 3 – high salinity, 4 – UV treatment, 5 – anaerobic growth, 6 – optimal conditions, 7 – high pH, 8 – low pH, 9 – amino acid starvation, 10 – sugar starvation, 11- hypoosmotic conditions, 12 – hyperosmotic conditions.

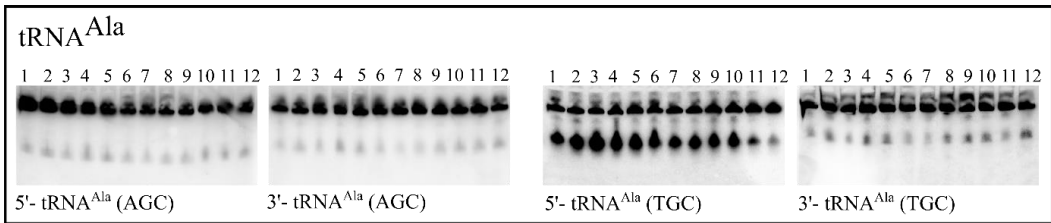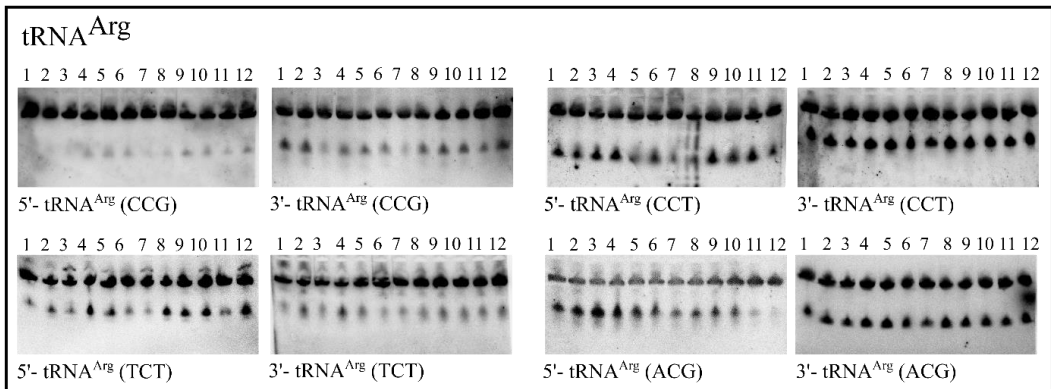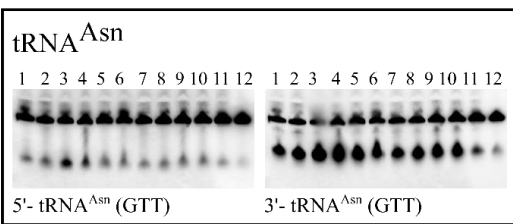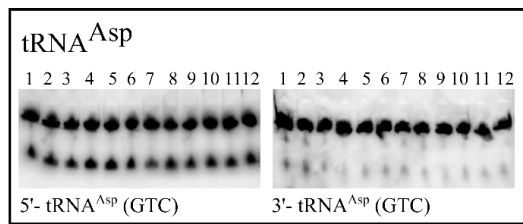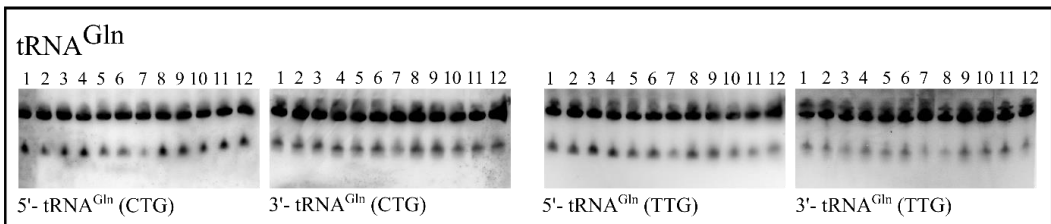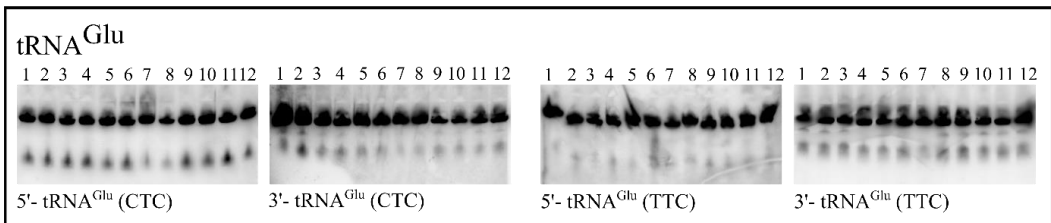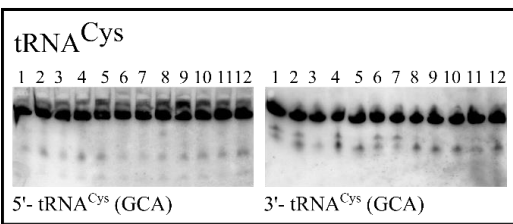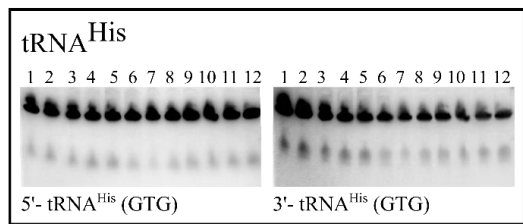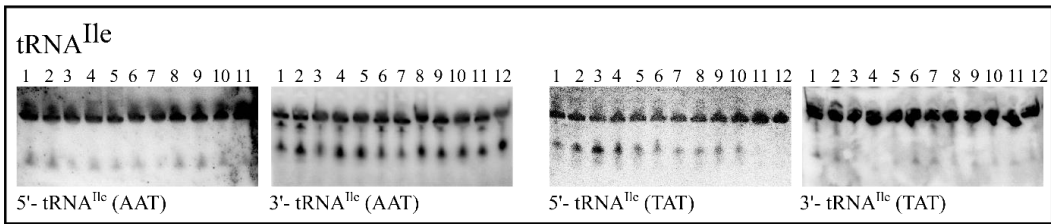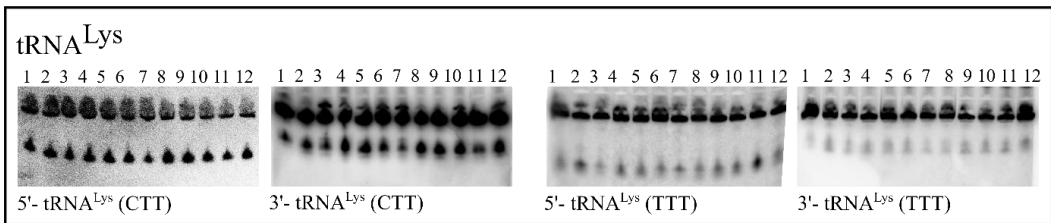

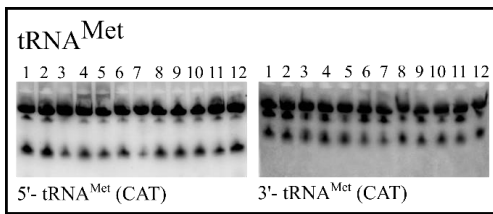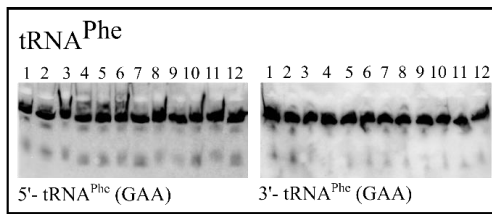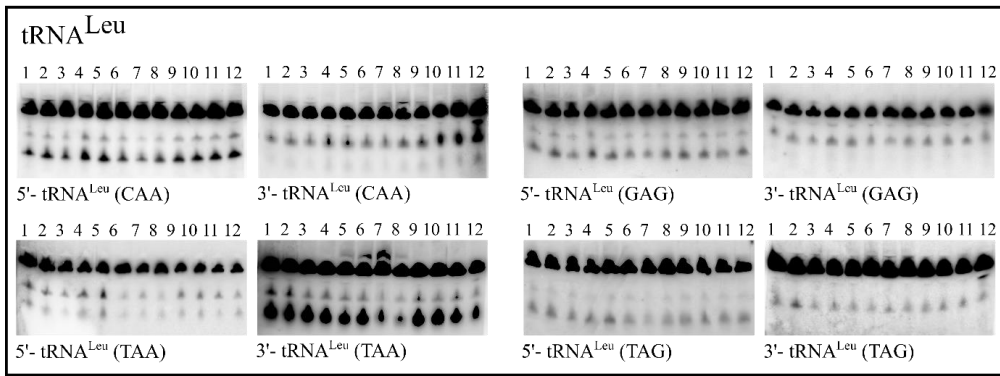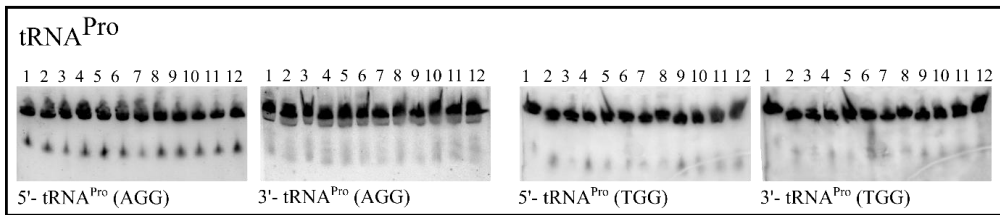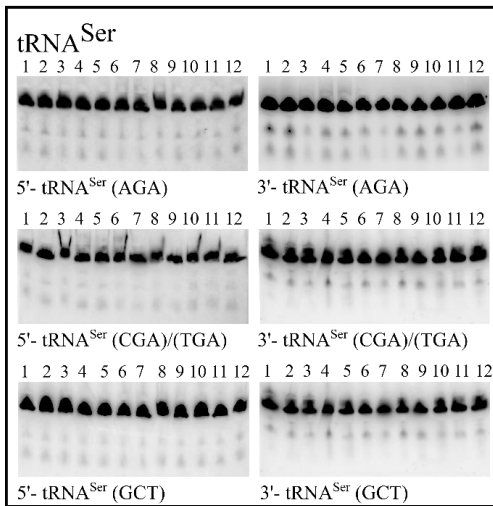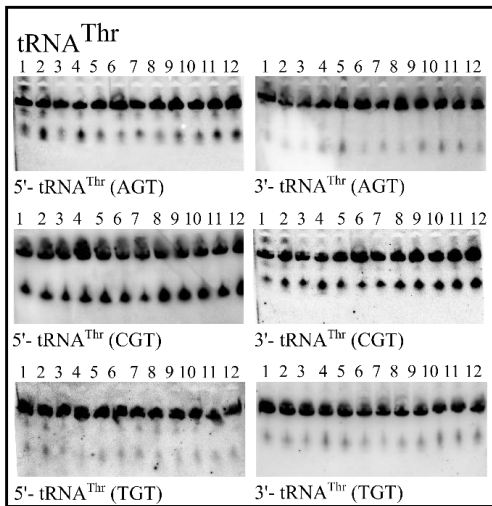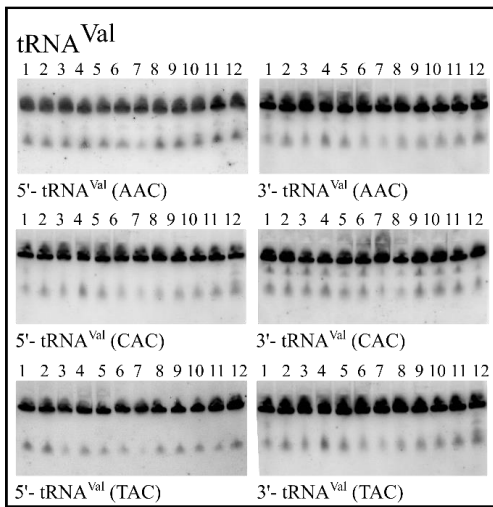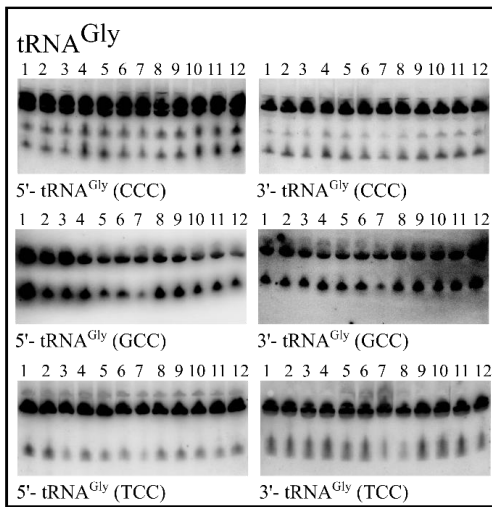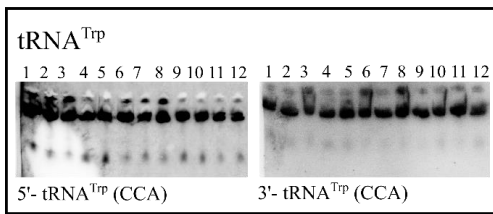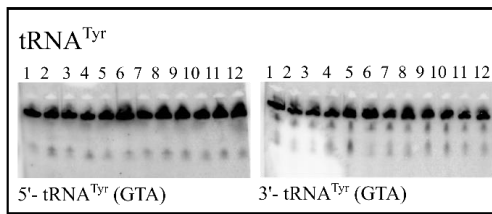

Supplement: FEB4-6-1186-s001.pdf [file FEB4-6-1186-s001.pdf]
